# Supplementary material for: Effective Prophylaxis of COVID-19 in Rhesus Macaques Using a Combination of Two Parenterally-Administered SARS-CoV-2 Neutralizing Antibodies
Source: Front Cell Infect Microbiol. 2021 Nov 18;11:753444. doi: 10.3389/fcimb.2021.753444 (PMC8637877; doi:10.3389/fcimb.2021.753444)
Supplement: Supplementary file 8 [file Table_4.pdf]

| Genomic |                 |                                     |         |        | Subgenomic N |  |                 |  |                                     |         | Subgenomic E |  |                 |  |                                     |         |    |
|---------|-----------------|-------------------------------------|---------|--------|--------------|--|-----------------|--|-------------------------------------|---------|--------------|--|-----------------|--|-------------------------------------|---------|----|
|         | Pharyngeal      |                                     | p-value | Symbol |              |  | Pharyngeal      |  | p-value                             | Symbol  |              |  | Pharyngeal      |  | p-value                             | Symbol  |    |
|         |                 | 2 mg/kg vs. control day 1           | 0.0286  | *      |              |  |                 |  | 2 mg/kg vs. control day 1           | 0.0286  | *            |  |                 |  | 2 mg/kg vs. control day 1           | 0.0286  | *  |
|         |                 | 2 mg/kg vs. control day 2           | 0.1143  | ns     |              |  |                 |  | 2 mg/kg vs. control day 2           | 0.0286  | *            |  |                 |  | 2 mg/kg vs. control day 2           | 0.0857  | ns |
|         |                 | 2 mg/kg vs. control day 3           | 0.0286  | *      |              |  |                 |  | 2 mg/kg vs. control day 3           | 0.0286  | *            |  |                 |  | 2 mg/kg vs. control day 3           | >0.9999 | ns |
|         |                 | 2 mg/kg vs. control day 5           | 0.0286  | *      |              |  |                 |  | 2 mg/kg vs. control day 5           | 0.1429  | ns           |  |                 |  | 2 mg/kg vs. control day 5           | >0.9999 | ns |
|         |                 | 2 mg/kg vs. control NEC             | 0.0286  | *      |              |  |                 |  | 2 mg/kg vs. control NEC             | 0.4286  | ns           |  |                 |  | 2 mg/kg vs. control NEC             | >0.9999 | ns |
|         |                 | Delayed Challenge vs. control day 1 | 0.0571  | ns     |              |  |                 |  | Delayed Challenge vs. control day 1 | 0.0571  | ns           |  |                 |  | Delayed Challenge vs. control day 1 | 0.0571  | ns |
|         |                 | Delayed Challenge vs. control day 2 | 0.1143  | ns     |              |  |                 |  | Delayed Challenge vs. control day 2 | 0.1143  | ns           |  |                 |  | Delayed Challenge vs. control day 2 | 0.2     | ns |
|         |                 | Delayed Challenge vs. control day 3 | 0.2286  | ns     |              |  |                 |  | Delayed Challenge vs. control day 3 | 0.2286  | ns           |  |                 |  | Delayed Challenge vs. control day 3 | >0.9999 | ns |
|         |                 | Delayed Challenge vs. control day 5 | 0.0571  | ns     |              |  |                 |  | Delayed Challenge vs. control day 5 | 0.4     | ns           |  |                 |  | Delayed Challenge vs. control day 5 | >0.9999 | ns |
|         |                 | Delayed Challenge vs. control NEC   | 0.2286  | ns     |              |  |                 |  | Delayed Challenge vs. control NEC   | >0.9999 | ns           |  |                 |  | Delayed Challenge vs. control NEC   | >0.9999 | ns |
|         | Nasal           |                                     |         |        |              |  | Nasal           |  |                                     |         |              |  | Bronchial Brush |  |                                     |         |    |
|         |                 | 20 mg/kg vs. control day 1          | 0.4857  | ns     |              |  |                 |  | 2 mg/kg vs. control day 1           | 0.6857  | ns           |  |                 |  | 20 mg/kg vs. control day 1          | 0.4286  | ns |
|         |                 | 20 mg/kg vs. control day 2          | 0.0286  | *      |              |  |                 |  | 2 mg/kg vs. control day 2           | 0.0286  | *            |  |                 |  | 20 mg/kg vs. control day 3          | >0.9999 | ns |
|         |                 | 20 mg/kg vs. control day 3          | 0.0286  | *      |              |  |                 |  | 2 mg/kg vs. control day 3           | 0.0286  | *            |  |                 |  | 20 mg/kg vs. control NEC            | >0.9999 | ns |
|         |                 | 20 mg/kg vs. control day 5          | 0.1143  | ns     |              |  |                 |  | 2 mg/kg vs. control day 5           | 0.1429  | ns           |  |                 |  | 6 mg/kg vs. control day 1           | 0.4286  | ns |
|         |                 | 20 mg/kg vs. control NEC            | 0.0286  | *      |              |  |                 |  | 2 mg/kg vs. control NEC             | 0.1429  | ns           |  |                 |  | 6 mg/kg vs. control day 3           | >0.9999 | ns |
|         |                 | 6 mg/kg vs. control day 1           | 0.2     | ns     |              |  |                 |  | Delayed Challenge vs. control day 1 | 0.4     | ns           |  |                 |  | 6 mg/kg vs. control NEC             | >0.9999 | ns |
|         |                 | 6 mg/kg vs. control day 2           | 0.1143  | ns     |              |  |                 |  | Delayed Challenge vs. control day 2 | 0.0571  | ns           |  |                 |  | 2 mg/kg vs. control day 1           | 0.4286  | ns |
|         |                 | 6 mg/kg vs. control day 3           | 0.2286  | ns     |              |  |                 |  | Delayed Challenge vs. control day 3 | 0.0571  | ns           |  |                 |  | 2 mg/kg vs. control day 3           | >0.9999 | ns |
|         |                 | 6 mg/kg vs. control day 5           | 0.0286  | *      |              |  |                 |  | Delayed Challenge vs. control day 5 | 0.1429  | ns           |  |                 |  | 2 mg/kg vs. control NEC             | >0.9999 | ns |
|         |                 | 6 mg/kg vs. control NEC             | 0.2286  | ns     |              |  |                 |  | Delayed Challenge vs. control NEC   | 0.2     | ns           |  |                 |  | Delayed Challenge vs. control day 1 | 0.4286  | ns |
|         |                 | 2 mg/kg vs. control day 1           | 0.2     | ns     |              |  | Bronchial Brush |  |                                     |         |              |  |                 |  | Delayed Challenge vs. control day 3 | >0.9999 | ns |
|         |                 | 2 mg/kg vs. control day 2           | 0.0286  | *      |              |  |                 |  | 20 mg/kg vs. control day 1          | 0.0571  | ns           |  |                 |  | Delayed Challenge vs. control NEC   | >0.9999 | ns |
|         |                 | 2 mg/kg vs. control day 3           | 0.0286  | *      |              |  |                 |  | 20 mg/kg vs. control day 3          | 0.0286  | *            |  |                 |  |                                     |         |    |
|         |                 | 2 mg/kg vs. control day 5           | 0.3429  | ns     |              |  |                 |  | 20 mg/kg vs. control NEC            | 0.4286  | ns           |  |                 |  |                                     |         |    |
|         |                 | 2 mg/kg vs. control NEC             | 0.0286  | *      |              |  |                 |  | 6 mg/kg vs. control day 1           | 0.0286  | *            |  |                 |  |                                     |         |    |
|         |                 | Delayed Challenge vs. control day 1 | 0.8571  | ns     |              |  |                 |  | 6 mg/kg vs. control day 3           | 0.0286  | *            |  |                 |  |                                     |         |    |
|         |                 | Delayed Challenge vs. control day 2 | 0.1143  | ns     |              |  |                 |  | 6 mg/kg vs. control NEC             | 0.4286  | ns           |  |                 |  |                                     |         |    |
|         |                 | Delayed Challenge vs. control day 3 | 0.0571  | ns     |              |  |                 |  | 2 mg/kg vs. control day 1           | 0.0286  | *            |  |                 |  |                                     |         |    |
|         |                 | Delayed Challenge vs. control day 5 | 0.4     | ns     |              |  |                 |  | 2 mg/kg vs. control day 3           | 0.0286  | *            |  |                 |  |                                     |         |    |
|         |                 | Delayed Challenge vs. control NEC   | 0.0571  | ns     |              |  |                 |  | 2 mg/kg vs. control NEC             | 0.4286  | ns           |  |                 |  |                                     |         |    |
|         | Bronchial Brush |                                     |         |        |              |  | BAL Cells       |  |                                     |         |              |  |                 |  |                                     |         |    |
|         |                 | 20 mg/kg vs. control day 1          | 0.1143  | ns     |              |  |                 |  | 20 mg/kg vs. control day 1          | 0.6857  | ns           |  |                 |  |                                     |         |    |
|         |                 | 20 mg/kg vs. control day 3          | 0.0286  | *      |              |  |                 |  | 20 mg/kg vs. control day 3          | 0.0286  | *            |  |                 |  |                                     |         |    |
|         |                 | 20 mg/kg vs. control NEC            | 0.4857  | ns     |              |  |                 |  | 20 mg/kg vs. control NEC            | 0.0286  | *            |  |                 |  |                                     |         |    |
|         |                 | 6 mg/kg vs. control day 1           | 0.0286  | *      |              |  |                 |  | 6 mg/kg vs. control day 1           | 0.6857  | ns           |  |                 |  |                                     |         |    |
|         |                 | 6 mg/kg vs. control day 3           | 0.0286  | *      |              |  |                 |  | 6 mg/kg vs. control day 3           | 0.0571  | ns           |  |                 |  |                                     |         |    |
|         |                 | 6 mg/kg vs. control NEC             | 0.0857  | ns     |              |  |                 |  | 6 mg/kg vs. control NEC             | 0.0286  | *            |  |                 |  |                                     |         |    |
|         |                 | 2 mg/kg vs. control day 1           | 0.0286  | *      |              |  |                 |  | 2 mg/kg vs. control day 1           | >0.9999 | ns           |  |                 |  |                                     |         |    |
|         |                 | 2 mg/kg vs. control day 3           | 0.0286  | *      |              |  |                 |  | 2 mg/kg vs. control day 3           | 0.0286  | *            |  |                 |  |                                     |         |    |
|         |                 | 2 mg/kg vs. control NEC             | 0.0286  | *      |              |  |                 |  | 2 mg/kg vs. control NEC             | 0.0286  | *            |  |                 |  |                                     |         |    |
|         | BAL Cells       |                                     |         |        |              |  |                 |  |                                     |         |              |  |                 |  |                                     |         |    |
|         |                 | 20 mg/kg vs. control day 1          | 0.6286  | ns     |              |  |                 |  |                                     |         |              |  |                 |  |                                     |         |    |
|         |                 | 20 mg/kg vs. control day 3          | 0.0286  | *      |              |  |                 |  |                                     |         |              |  |                 |  |                                     |         |    |
|         |                 | 20 mg/kg vs. control NEC            | 0.0286  | *      |              |  |                 |  |                                     |         |              |  |                 |  |                                     |         |    |
|         |                 | 6 mg/kg vs. control day 1           | 0.4286  | ns     |              |  |                 |  |                                     |         |              |  |                 |  |                                     |         |    |
|         |                 | 6 mg/kg vs. control day 3           | 0.0571  | ns     |              |  |                 |  |                                     |         |              |  |                 |  |                                     |         |    |
|         |                 | 6 mg/kg vs. control NEC             | 0.0286  | *      |              |  |                 |  |                                     |         |              |  |                 |  |                                     |         |    |
|         |                 | 2 mg/kg vs. control day 1           | 0.4857  | ns     |              |  |                 |  |                                     |         |              |  |                 |  |                                     |         |    |
|         |                 | 2 mg/kg vs. control day 3           | 0.0286  | *      |              |  |                 |  |                                     |         |              |  |                 |  |                                     |         |    |
|         |                 | 2 mg/kg vs. control NEC             | 0.0286  | *      |              |  |                 |  |                                     |         |              |  |                 |  |                                     |         |    |
|         |                 | Delayed Challenge vs. control day 1 | 0.2286  | ns     |              |  |                 |  |                                     |         |              |  |                 |  |                                     |         |    |
|         |                 | Delayed Challenge vs. control day 3 | 0.0571  | ns     |              |  |                 |  |                                     |         |              |  |                 |  |                                     |         |    |
|         |                 | Delayed Challenge vs. control NEC   | 0.0571  | ns     |              |  |                 |  |                                     |         |              |  |                 |  |                                     |         |    |
