# Supplementary material for: Effective Prophylaxis of COVID-19 in Rhesus Macaques Using a Combination of Two Parenterally-Administered SARS-CoV-2 Neutralizing Antibodies
Source: PubMed Central journal article supplement (PMC8637877; doi:10.3389/fcimb.2021.753444), 2021-11-18
Supplement: Table_1.pdf [file Table_1.pdf]

| Animal      | Species               | Age (years) | Source | Sex  | Weight | Viral Dose            | Exposure | mAb Dose | Challenged post |
|-------------|-----------------------|-------------|--------|------|--------|-----------------------|----------|----------|-----------------|
|             |                       |             |        |      | (kg)   | (TCID <sub>50</sub> ) | Route    | (mg/kg)  | Infusion (Days) |
| <b>LM74</b> | <i>Macaca mulatta</i> | 4           | TNPRC  | Male | 6.2    | 2.0 x 10 <sup>6</sup> | IT/IN    | 0        | 3               |
| <b>IK92</b> | <i>Macaca mulatta</i> | 11          | TNPRC  | Male | 6.9    | 2.0 x 10 <sup>6</sup> | IT/IN    | 0        | 3               |
| <b>KF89</b> | <i>Macaca mulatta</i> | 8           | TNPRC  | Male | 8.2    | 2.0 x 10 <sup>6</sup> | IT/IN    | 0        | 3               |
| <b>LM30</b> | <i>Macaca mulatta</i> | 4           | TNPRC  | Male | 8.1    | 2.0 x 10 <sup>6</sup> | IT/IN    | 0        | 3               |
| <b>LN97</b> | <i>Macaca mulatta</i> | 4           | TNPRC  | Male | 4.3    | 2.0 x 10 <sup>6</sup> | IT/IN    | 20       | 3               |
| <b>LR09</b> | <i>Macaca mulatta</i> | 4           | TNPRC  | Male | 4.8    | 2.0 x 10 <sup>6</sup> | IT/IN    | 20       | 3               |
| <b>MD42</b> | <i>Macaca mulatta</i> | 3           | TNPRC  | Male | 5.0    | 2.0 x 10 <sup>6</sup> | IT/IN    | 20       | 3               |
| <b>MF22</b> | <i>Macaca mulatta</i> | 3           | TNPRC  | Male | 5.0    | 2.0 x 10 <sup>6</sup> | IT/IN    | 20       | 3               |
| <b>MC12</b> | <i>Macaca mulatta</i> | 3           | TNPRC  | Male | 5.3    | 2.0 x 10 <sup>6</sup> | IT/IN    | 6        | 3               |
| <b>LR41</b> | <i>Macaca mulatta</i> | 4           | TNPRC  | Male | 5.7    | 2.0 x 10 <sup>6</sup> | IT/IN    | 6        | 3               |
| <b>ME55</b> | <i>Macaca mulatta</i> | 3           | TNPRC  | Male | 5.8    | 2.0 x 10 <sup>6</sup> | IT/IN    | 6        | 3               |
| <b>LV40</b> | <i>Macaca mulatta</i> | 4           | TNPRC  | Male | 5.6    | 2.0 x 10 <sup>6</sup> | IT/IN    | 6        | 3               |
| <b>LM12</b> | <i>Macaca mulatta</i> | 4           | TNPRC  | Male | 6.1    | 2.0 x 10 <sup>6</sup> | IT/IN    | 2        | 3               |
| <b>LT54</b> | <i>Macaca mulatta</i> | 3           | TNPRC  | Male | 6.2    | 2.0 x 10 <sup>6</sup> | IT/IN    | 2        | 3               |
| <b>MG10</b> | <i>Macaca mulatta</i> | 3           | TNPRC  | Male | 6.0    | 2.0 x 10 <sup>6</sup> | IT/IN    | 2        | 3               |
| <b>IR17</b> | <i>Macaca mulatta</i> | 11          | TNPRC  | Male | 6.3    | 2.0 x 10 <sup>6</sup> | IT/IN    | 2        | 3               |
| <b>LP79</b> | <i>Macaca mulatta</i> | 4           | TNPRC  | Male | 5.5    | 2.0 x 10 <sup>6</sup> | IT/IN    | 20       | 75              |
| <b>LR93</b> | <i>Macaca mulatta</i> | 4           | TNPRC  | Male | 6.0    | 2.0 x 10 <sup>6</sup> | IT/IN    | 20       | 75              |
| <b>MC61</b> | <i>Macaca mulatta</i> | 3           | TNPRC  | Male | 5.7    | 2.0 x 10 <sup>6</sup> | IT/IN    | 20       | 75              |
