# Supplementary material for: Effective Prophylaxis of COVID-19 in Rhesus Macaques Using a Combination of Two Parenterally-Administered SARS-CoV-2 Neutralizing Antibodies
Source: PubMed Central journal article supplement (PMC8637877; doi:10.3389/fcimb.2021.753444), 2021-11-18
Supplement: Table_2.pdf [file Table_2.pdf]

| <b>Target</b>           | <b>Primer/Probe Designation</b> | <b>Sequence</b>                                             |
|-------------------------|---------------------------------|-------------------------------------------------------------|
| Genomic Nucleocapsid    | 2019-nCoV_N1-F                  | 5'-GAC CCC AAA ATC AGC GAA AT-3'                            |
|                         | 2019-nCoV_N1-R                  | 5'-TCT GGT TAC TGC CAG TTG AAT CTG-3'                       |
|                         | 2019-nCoV_N1-P                  | 5'-FAM-ACC CCG CAT TAC GTT TGG TGG ACC-BHQ-3'               |
| Subgenomic Envelope     | SgE-F                           | 5'-CGA TCT CTT GTA GAT CTG TTC TC-3'                        |
|                         | SgE-R                           | 5'-T GTG TGC GTA CTG CTG CAA TAT-3'                         |
|                         | SgE-P                           | 5'-FAM-ACA CTA GCC ATC CTT ACT GCG CTT CG-BHQ-3'            |
| Subgenomic Nucleocapsid | SgN-F                           | 5'-CGA TCT CTT GTA GAT CTG TTC TC-3'                        |
|                         | SgN-R                           | 5'-GGT GAA CCA AGA CGC AGT AT-3'                            |
|                         | SgN-P                           | 5'-56-FAM/TAA CCA GAA/ZEN/TGG AGA ACG CAG TGG G/3IABkFQ/-3' |
