# Supplementary material for: Effective Prophylaxis of COVID-19 in Rhesus Macaques Using a Combination of Two Parenterally-Administered SARS-CoV-2 Neutralizing Antibodies
Source: PubMed Central journal article supplement (PMC8637877; doi:10.3389/fcimb.2021.753444), 2021-11-18
Supplement: Table_3.pdf [file Table_3.pdf]

| Genomic |                      |         |        | Subgenomic N |                      |         |        | Subgenomic E |                      |         |        |
|---------|----------------------|---------|--------|--------------|----------------------|---------|--------|--------------|----------------------|---------|--------|
|         | Pharyngeal           | p-value | Symbol |              | Pharyngeal           | p-value | Symbol |              | Pharyngeal           | p-value | Symbol |
|         | 20 mg/kg vs. control | 0.0043  | **     |              | 20 mg/kg vs. control | 0.0036  | **     |              | 20 mg/kg vs. control | 0.0056  | **     |
|         | 6 mg/kg vs. control  | 0.0154  | *      |              | 6 mg/kg vs. control  | 0.0036  | **     |              | 6 mg/kg vs. control  | 0.0056  | **     |
|         | 2 mg/kg vs. control  | 0.2738  | ns     |              | 2 mg/kg vs. control  | 0.3367  | ns     |              | 2 mg/kg vs. control  | 0.1177  | ns     |
|         | Delayed Challenge    | 0.9173  | ns     |              | Delayed Challenge    | 0.7044  | ns     |              | Delayed Challenge    | 0.1125  | ns     |
|         | Nasal                |         |        |              | Nasal                |         |        |              | Nasal                |         |        |
|         | 20 mg/kg vs. control | 0.1307  | ns     |              | 20 mg/kg vs. control | 0.0272  | *      |              | 20 mg/kg vs. control | 0.0259  | *      |
|         | 6 mg/kg vs. control  | 0.0804  | ns     |              | 6 mg/kg vs. control  | 0.0101  | *      |              | 6 mg/kg vs. control  | 0.0399  | *      |
|         | 2 mg/kg vs. control  | 0.2738  | ns     |              | 2 mg/kg vs. control  | 0.2719  | ns     |              | 2 mg/kg vs. control  | 0.0322  | *      |
|         | Delayed Challenge    | >0.9999 | ns     |              | Delayed Challenge    | 0.3218  | ns     |              | Delayed Challenge    | 0.0124  | *      |
|         | Bronchial Brush      |         |        |              | Bronchial Brush      |         |        |              | Bronchial Brush      |         |        |
|         | 20 mg/kg vs. control | 0.6669  | ns     |              | 20 mg/kg vs. control | 0.2849  | ns     |              | 20 mg/kg vs. control | 0.1006  | ns     |
|         | 6 mg/kg vs. control  | 0.0801  | ns     |              | 6 mg/kg vs. control  | 0.0685  | ns     |              | 6 mg/kg vs. control  | 0.1006  | ns     |
|         | 2 mg/kg vs. control  | 0.1205  | ns     |              | 2 mg/kg vs. control  | 0.0685  | ns     |              | 2 mg/kg vs. control  | 0.1006  | ns     |
|         | Delayed Challenge    | 0.0087  | **     |              | Delayed Challenge    | 0.0051  | **     |              | Delayed Challenge    | 0.1527  | ns     |
|         | BAL Cells            |         |        |              | BAL Cells            |         |        |              | BAL Cells            |         |        |
|         | 20 mg/kg vs. control | 0.0677  | ns     |              | 20 mg/kg vs. control | 0.7055  | ns     |              | 20 mg/kg vs. control | 0.0033  | **     |
|         | 6 mg/kg vs. control  | 0.1409  | ns     |              | 6 mg/kg vs. control  | 0.8805  | ns     |              | 6 mg/kg vs. control  | 0.0033  | **     |
|         | 2 mg/kg vs. control  | 0.0621  | ns     |              | 2 mg/kg vs. control  | >0.9999 | ns     |              | 2 mg/kg vs. control  | 0.0033  | **     |
|         | Delayed Challenge    | 0.1252  | ns     |              | Delayed Challenge    | 0.0163  | *      |              | Delayed Challenge    | 0.0078  | **     |
