# Supplementary material for: Effective Prophylaxis of COVID-19 in Rhesus Macaques Using a Combination of Two Parenterally-Administered SARS-CoV-2 Neutralizing Antibodies
Source: PubMed Central journal article supplement (PMC8637877; doi:10.3389/fcimb.2021.753444), 2021-11-18
Supplement: Table_5.pdf [file Table_5.pdf]

|                                   | 20 mg/kg challenged |      |      |      | 6 mg/kg challenged |      |      |      | 2 mg/kg challenged |      |      |      | mAb delayed challenge |      |      | mAb CTRLs |      | Naive |      |
|-----------------------------------|---------------------|------|------|------|--------------------|------|------|------|--------------------|------|------|------|-----------------------|------|------|-----------|------|-------|------|
| Microscopic Findings              | LN97                | LR09 | MD42 | MF22 | LR41               | LV40 | MC12 | ME55 | IR17               | LM12 | LT54 | MG10 | LP79                  | LR93 | MC61 | IK92      | LM74 | LM30  | KF89 |
| Interstitial inflammation         | ++                  | ++   | +    | +    | +                  | ++   | ++   | ++   | ++                 | ++   | ++   | ++   | -                     | +    | +    | +++       | ++   | ++    | +++  |
| Type II pneumocyte hyperplasia    | -                   | ++   | +    | -    | -                  | -    | ++   | ++   | -                  | -    | -    | -    | -                     | -    | -    | +++       | -    | ++    | +++  |
| Hyaline membrane formation        | -                   | -    | -    | -    | -                  | -    | -    | +    | -                  | -    | -    | -    | -                     | -    | -    | +         | -    | -     | -    |
| BALT hyperplasia                  | -                   | -    | +    | -    | -                  | -    | -    | -    | -                  | -    | -    | -    | +                     | +    | +    | -         | -    | +     | -    |
| Pharyngitis                       | +++                 | -    | -    | -    | -                  | ++   | -    | ++   | -                  | +++  | -    | -    | -                     | -    | -    | +         | -    | -     | -    |
| Nephritis                         | ++                  | -    | ++   | +++  | +                  | -    | -    | +    | -                  | +    | -    | -    | -                     | -    | -    | -         | -    | -     | -    |
| Gastrointestinal inflammation     | +++                 | ++   | ++   | +++  | -                  | +++  | ++   | +++  | ++                 | +++  | +++  | ++   | -                     | -    | -    | ++        | ++   | +++   | +++  |
| Myocarditis                       | -                   | -    | +    | -    | -                  | +    | -    | -    | -                  | ++   | -    | ++   | -                     | -    | -    | -         | -    | -     | -    |
| Thrombosis                        | -                   | -    | -    | -    | +                  | -    | -    | -    | -                  | -    | -    | -    | -                     | -    | -    | -         | -    | -     | -    |
| Bronchial lymph node hyperplasia  | -                   | -    | ++   | ++   | +++                | -    | +++  | +++  | -                  | -    | +++  | ++   | -                     | -    | -    | ++        | +++  | -     | -    |
| Mesenteric lymph node hyperplasia | ++                  | -    | -    | -    | -                  | -    | -    | -    | -                  | -    | -    | -    | ++                    | ++   | ++   | -         | -    | -     | -    |
| Splenic lymphoid hyperplasia      | ++                  | -    | +++  | -    | ++                 | -    | ++   | +++  | -                  | -    | -    | ++   | -                     | ++   | +++  | ++        | -    | ++    | -    |
